# Supplementary material
Source: PubMed Central journal article supplement (PMC10539517)
Supplement: 41416_2023_2393_MOESM2_ESM.pdf [file 41416_2023_2393_MOESM2_ESM.pdf]

# 1 **Supplemental Methods**

2

## 3 **Clinical specimens**

4 A total of 8 human normal brain tissues (NBTs) and 56 glioma tissue specimens were  
5 used in this study. All specimens were collected at the Department of Neurosurgery,  
6 Shengjing Hospital of China Medical University. Specimens were placed in liquid  
7 nitrogen for cryopreservation immediately after surgical resection. NBTs were  
8 collected from patients with severe brain trauma, cerebral hemorrhage, or epilepsy  
9 and used as negative controls. All glioma specimens were histologically graded by  
10 two experienced clinical pathologists according to the World Health Organization  
11 guidelines for tumors of the CNS (2021) and divided into four groups according to the  
12 grade: 1. Grade I (WHO I, n=6); 2. Grade II (WHO II, n=10); 3. Grade III (WHO III,  
13 n=14); 4. Grade IV (WHO IV, n=26). All specimens used in this study were approved  
14 by the Ethics Committee of the Shengjing Hospital of China Medical University.

15

## 16 **Cell culture**

17 Normal human astrocytes (NHA) were purchased from ScienCell Research  
18 Laboratories (Carlsbad, CA, USA). Human bone marrow mesenchymal stem cells  
19 (hBMSCs) were purchased from Shenyang Cell Center. Human glioma cell lines  
20 U251 and U373 and human embryonic kidney cell line HEK-293T were purchased  
21 from the Cell Resource Center of Shanghai Institutes for Biological Sciences of the  
22 Chinese Academy of Sciences. All cell lines were authenticated by short tandem  
23 repeat (STR) profiling and confirmed to be mycoplasma negative before the  
24 beginning of the study. NHA cells and hBMSCs were cultured in RPMI 1640 medium  
25 supplemented with 10% fetal bovine serum (FBS) and Dulbecco's modified eagle  
26 medium/nutrient mixture F-12 (DMEM/F12) medium supplemented with 10% FBS  
27 (Thermo Fisher Scientific, USA), respectively; human glioma cell lines U251 and  
28 U373 and human embryonic kidney cell lines HEK-293T were cultured in DMEM  
29 high glucose medium supplemented with 10% FBS at 37 °C in an atmosphere  
30 containing 5%CO<sub>2</sub>.

31

## 32 **Cell transfection**

33 The miR-1208 overexpression and its negative control lentivirus were purchased from  
34 GenePharma (Shanghai, China). The METTL3 overexpression and its negative  
35 control plasmids were constructed by GenScript (Piscataway, NJ, USA). The  
36 short-hairpin RNA (shRNA) against METTL3, NUP214 and IGF2BP2 (every gene  
37 designed three target sequences) and their negative controls were purchased from  
38 GenePharma. The shRNA template sequence was provided in Table.S1. In  
39 pre-experiments, sh-METTL3-1, sh-NUP214-2, and sh-IGF2BP2-1 were the target  
40 sequences with the highest knockdown efficiency screened by western blot after 48 h  
41 of transient transfection (results showed in Fig.S6), then the stable transfection was  
42 conducted with the above plasmids. Cells with good growth conditions were seeded  
43 into 24-well plates. When the cell confluency reached about 50-60%, the cells were  
44 transfected with corresponding lentiviruses or plasmids according to the optimal  
45 infection conditions determined in the pre-experiment. Media were replaced with  
46 fresh complete medium 12 h after transfection, and cells were cultured for 48 h. The  
47 fluorescence expression of the cells was observed under a fluorescence microscope.  
48 G418, puromycin, and hygromycin (Sigma-Aldrich, USA) were used to further screen  
49 the cells and establish stable transfection cell lines.

50

## 51 **Separation, extraction, and identification of Exos**

52 When cultured hBMSCs reached 60–70% confluence, the original culture medium  
53 was discarded; the cells were washed thrice with phosphate buffered saline (PBS) and  
54 cultured in Exos-free serum medium for 48 h, and the cell supernatant was collected.  
55 The cell supernatant was centrifuged at  $300 \times g$  for 10 min,  $2000 \times g$  for 20 min, and  
56  $10000 \times g$  for 30 min, and the supernatant was subsequently transferred into a new  
57 centrifuge tube. The precipitation was discarded, and the supernatant was centrifuged  
58 at  $100000 \times g$  for 70 min. Next, the supernatant was discarded, and 1 ml of PBS was  
59 added to resuspend the precipitation. The suspended precipitates in multiple tubes  
60 were transferred into new centrifugal tubes to form pairs of sample tubes which were

61 centrifuged at 100,000 *g* for 70 min. The supernatant was then discarded, and the  
62 pellet was resuspended in the desired amount of PBS and stored in aliquots at -80°C  
63 for later use. The properties of Exos were confirmed by performing transmission  
64 electron microscopy (TEM), NTA, and western blot analysis on the obtained Exos  
65 and detecting the expression of Exos-specific markers TSG101, CD81, CD9, and  
66 calnexin.

67

### 68 **RNA extraction, reverse transcription, and qRT-PCR**

69 Total RNA was extracted from clinically obtained tissue samples, NHA, U251 and  
70 U373 cell lines using the Trizol reagent, and RNA in Exos was extracted using the  
71 Trizol LS reagent (Thermo Fisher Scientific, USA). The obtained RNA samples were  
72 diluted to determine the RNA concentration and OD260/OD280 value. The RNA  
73 samples can be directly reverse transcribed or stored in a -80°C refrigerator for later  
74 use. The RNA was reverse transcribed into cDNA using the reverse transcription kit  
75 of TaKaRa company, and the reaction system and reaction conditions were  
76 configured according to the manufacturer's instructions. Real-time quantitative PCR  
77 analysis was performed using the TB Green<sup>®</sup> Fluorescence Quantitative PCR Kit of  
78 TaKaRa Company. The primers are exhibited in Table S2. U6 was used as the  
79 endogenous control, the average  $\Delta\text{Ct}$  of the control group was calculated, and the  
80 relative expression levels of each detection indicators were calculated by the  $2^{-\Delta\Delta\text{Ct}}$   
81 assay.

82

### 83 **Western blot analysis**

84 Each sample was lysed on ice using RIPA protein lysis buffer containing 1% PMSF.  
85 After the mixture was centrifuged at 14,000  $\times g$  for 50 min at 4 °C, the supernatant  
86 was aspirated to obtain total protein. The nuclear protein of the cell samples was  
87 extracted using the nuclear protein extraction kit of Thermo Company according to  
88 the manufacturer's instructions. The protein concentration was determined using the  
89 BCA method. The same amount of protein samples were loaded, separated on the  
90 SDS-PAGE gel via electrophoresis, and transferred to the poly vinylidene fluoride  
91 (PVDF) membrane (Millipore, Shanghai, China). After transfer, the membrane was

92 quickly washed and placed in tris buffered saline with tween (TBST) solution  
93 containing 5% nonfat milk for blocking at room temperature for 2 h. After blocking,  
94 the PVDF membrane was removed from the solution and immersed in the primary  
95 antibody (METTL3, 1:1000, abcam, ab195352, USA; NUP214, 1:1000, abcam,  
96 ab70497, USA; IGF2BP2, 1:1000, abcam, ab128175, USA; p-Smad2, 1:1000, abcam,  
97 ab280888, USA; p-Smad3, 1:1000, abcam, ab52903, USA; GAPDH, 1:5000,  
98 Proteintech, 10494-1-AP, USA; TBP, 1:500, Proteintech, 22006-1-AP, USA)  
99 working solution for overnight incubation at 4 °C on a shaker. After the primary  
100 antibody incubation, the membrane was washed thrice with TBST buffer for 10 min  
101 each and incubated with goat anti-rabbit secondary antibody for 2 h on a shaker at  
102 room temperature. After the secondary antibody incubation, the membrane was  
103 washed again with TBST buffer three times for 10 min each. The ECL luminescent  
104 solution (Beyotime, China) was dropped on the surface of the PVDF membrane, and  
105 the visualized protein bands were analyzed after the chemiluminescence imaging  
106 system was used to emit light. Finally, the relative expression levels of the  
107 corresponding detection indicators in each protein sample were calculated.

108

#### 109 **Cell counting kit-8 (CCK-8) assay**

110 Cultured U251 and U373 cells were prepared into single cell suspensions and seeded  
111 in 96-well plates at a density of 100  $\mu$ l per well (2000 cells). Cells were treated  
112 correspondingly according to different experimental conditions in each group. Five  
113 replicate wells were set up in each experimental group, and all experiments were  
114 repeated independently at least three times. The CCK-8 kit (Beyotime, China) was  
115 used to detect the cell viability after 48 h; CCK-8 solution (10  $\mu$ l) was added to each  
116 well; the cells were then incubated at 37°C for 2 h; the optical density (OD) of each  
117 well was measured at 450nm, and cell viability was calculated.

118

#### 119 **Clone formation experiments**

120 The cells of each experimental group in a good growth state were prepared into single  
121 cell suspension, seeded in a 60 mm petri dish at a density of 1000 cells per dish, and  
122 cultured in complete medium supplemented with 30% FBS. The cells were monitored,

123 and the medium was changed once every three days. The petri dishes were collected  
124 when the number of cells in most single clones was greater than 100. Cultured cells  
125 were fixed and stained with crystal violet, washed with ddH<sub>2</sub>O for several times, dried,  
126 and photographed to count the clones. Three independent experiments were  
127 conducted for each experimental group.

128

### 129 **Cell migration and invasion experiments**

130 *In vitro* migration and invasion abilities of cells were detected using Transwell  
131 chambers (Costar, Corning, USA), with a diameter of 6.5 mm and a pore size of 8.0  
132 μm. In the migration experiment, the cells of each experimental group in a good  
133 growth state were digested with trypsin, and the cell density was adjusted to  $5 \times 10^5$   
134 cells/mL after counting. Cells were subsequently pipetted into a single cell suspension  
135 with serum-free medium. Next, 100 μl of the suspension was added to the upper  
136 chamber and 600 μl of complete culture medium containing 10% FBS was added to  
137 the lower chamber, following which the cells were cultured in a constant temperature  
138 incubator at 37°C with 5% CO<sub>2</sub>. After 48 h, the chamber was retrieved, the culture  
139 medium of the upper chamber was discarded, and the chamber was fixed after PBS  
140 washing. After fixation for 30 min, the non-migratory cells on the upper surface of the  
141 membrane were scraped off with cotton swabs. After being completely dried, the cells  
142 were dyed in 10% Giemsa stain solution for 60 min. After being washed with PBS,  
143 the chamber was placed under an inverted microscope to observe and count the  
144 number of transmembrane cells in 5 random high-power fields, and the average value  
145 was calculated. Three independent experiments were repeatedly performed for each  
146 experimental group. In the invasion assay, the steps were similar to the migration  
147 assay, except that the chambers need to be pretreated. The polycarbonate membrane  
148 on the upper surface of the chamber was covered with Matrigel solution (BD  
149 biosciences, USA) with a concentration of 500 ng/μl and incubated at 37 °C for 4 h.  
150 The subsequent steps were the same as in the migration experiment.

151

### 152 **Apoptosis assay**

153 Cells in each experimental group were collected and double-stained with Annexin

154 V-PE/7-AAD using the Annexin V-PE/7-AAD double staining apoptosis kit (BD  
155 biosciences, USA) according to the manufacturer's instructions. Sample detection  
156 were performed using a flow cytometer and experimental data was analyzed.

157

### 158 **Immunohistochemical (IHC) experiments**

159 Fresh tissue was fixed with 4% paraformaldehyde for 48 h and immunohistochemistry  
160 was performed using the Ki-67 antibody (1:10000, Proteintech, 27309-1-AP, USA)  
161 and IHC Kit (MXB, China) according to the manufacturer's instructions. Briefly,  
162 paraffin-embedded sections were deparaffinized in different concentrations of alcohol  
163 and xylene using an automatic dewaxing machine, and then heated in Tris-EDTA  
164 antigen retrieval solution for antigen retrieval. After cooling, operations were  
165 conducted according to the steps of IHC Kit. Finally, DAB was used for color  
166 development; slides were counterstained with hematoxylin, dehydrated, and mounted  
167 for imaging under a microscope.

168

### 169 **Dual-luciferase reporter gene assay**

170 TargetScan online bioinformatics software was used to predict the potential binding  
171 sites of miR-1208 and METTL3. The m<sup>6</sup>A binding site of 3'UTR of NUP214 mRNA  
172 was predicted by m<sup>6</sup>A bioinformatics analyzing software SRAMP and RMVar.  
173 METTL3 3'UTR wild-type and mutant plasmid were constructed using pmirGLO  
174 vector, and NUP214 3'UTR wild-type and mutant double luciferase plasmids were  
175 purchased from Genscript Company. The day before the experiment, HEK-293 or  
176 U251 cells were seeded in a 96-well plate. The cells were observed to grow well and  
177 achieve about 70-80% confluence on the day of transfection. The dual-luciferase  
178 empty plasmid and the corresponding wild-type or mutant dual-luciferase plasmid  
179 were co-transfected with miR-1208 mimics and their negative controls or sh-NC and  
180 sh-METTL3; after 48 h of culture, the luciferase activity was detected by a  
181 dual-luciferase reporter gene detection system (Promega, USA).

182

### 183 **RNA-binding protein immunoprecipitation assay (RIP)**

184 The RIP experiment was performed using the EZ-Magna RIP kit (Millipore, USA)

185 according to the manufacturer's instructions. After glioma cells were lysed with RNA  
186 lysis buffer, the whole cell lysate was collected and incubated with RIP buffer  
187 containing human anti-IGF2BP2 antibody and magnetic beads with gentle shaking  
188 overnight. The anti-IgG group was used as the control group. The samples were  
189 incubated and treated with protease K, followed by RNA concentration determination  
190 with a spectrophotometer. Finally, the resulting RNA was purified and tested for  
191 binding using qRT-PCR.

192

### 193 **RNA methylation co-immunoprecipitation (MeRIP)**

194 The MeRIP Kit (BersinBio, China) was used to carry out the experiment according to  
195 the manufacturer's instructions. First,  $2 \times 10^7$  of glioma cells were collected and total  
196 RNA was extracted, then the RNA samples were fragmented into fragments of about  
197 100 nt long, and the fragmented samples were divided into Input group, IP group and  
198 IgG group. A total of 5  $\mu\text{g}$  of anti-m<sup>6</sup>A antibody was added to the IP group, and 5  $\mu\text{g}$   
199 of anti-IgG antibody was added to the IgG group, and the mixtures were placed in a  
200 vertical mixer at 4 °C and incubated for 2-4 h. The prepared protein A/G magnetic  
201 beads were mixed and incubated with antibody hybrid solutions of IP or IgG group.  
202 After incubation, the sample was digested with proteinase K. Finally, the magnetic  
203 beads were collected and the supernatant was transferred to a new RNase-free tube.  
204 Finally, the resulting RNA was purified and tested for binding using qRT-PCR.

205

### 206 **RNA stability detection**

207 RNA stability assays were performed using actinomycin D according to the  
208 manufacturer's instructions. HEK293 cells were transfected with METTL3 silencing  
209 plasmid or its negative control plasmid, and treated with actinomycin D (final  
210 concentration: 5 mg/ml) or DMSO. The total RNA of cells was extracted and  
211 analyzed by qRT-PCR at 0, 2, 4, 6, 8, and 10 h after transfection.

212

### 213 **Nascent RNA capture assay**

214 The expression of NUP214 nascent RNA was detected using the Click-iT<sup>®</sup> Nascent  
215 RNA Capture Kit according to the manufacturer's instructions. First, nascent RNA in

216 cells was labeled with 0.2 mM EU, and the cells were harvested after 4 h of  
217 incubation at room temperature, and total RNA was extracted. The Click-iT RNA  
218 reaction mixture was prepared and mixed with UltraPure™ glycogen, ammonium  
219 acetate and 75% ethanol, and the mixture was incubated overnight (-20°C, 12–16 h).  
220 After incubation, the supernatant was discarded after centrifugation, air-dried, and 30  
221 µl of DEPC water was added and the RNA concentration was measured. The mixture  
222 was prepared by mixing 125 µl of Click-iT RNA reaction buffer, 2 µl of  
223 RNaseOUT™ RNA recombinant ribonuclease inhibitor, 1 µg of RNA and DEPC  
224 water, mixed well, and incubated at 70°C for 5 min. The magnetic beads were fixed  
225 using DynaMag™-2 magnets, and the SuperScript® enzyme mixture was added and  
226 heated at 70°C; the cDNA was released from the magnetic beads by intermittent  
227 vortex oscillation. Finally, the supernatant was collected by centrifugation, and the  
228 expression of nascent RNA was detected using qRT-PCR.

229

### 230 **EB extravasation assay and *In vivo* experiment on Exos combined with FUS on** 231 **anti-tumor effect in nude mice**

232 Female BALB/c nude mice (6 weeks old) were purchased from Vital River  
233 Laboratory Animal Technology (China) and housed in SPF-grade animal facility. All  
234 animal experiments were approved by the Laboratory Animal Management  
235 Committee of Shengjing Hospital of China Medical University. The experimental  
236 animals were randomly divided into two groups (control and FUS groups) with five  
237 animals in each group. Nude mice were subjected to abdominal anesthesia with 2%  
238 pentobarbital sodium and fixed to a stereotaxic brain locator. In the FUS group, FUS  
239 irradiation was performed after microbubbles (MBs, Bracco SonoVue®, Italy) were  
240 injected into the tail vein of nude mice. Ultrasonic parameters were set at a frequency  
241 of 650 KHz, an intensity of 1 W, and a duration time of 1 min. After irradiation, 2%  
242 Evans blue (EB) solution was injected, and only EB solution was injected in the  
243 control group. The nude mice were sacrificed 1 h later, and the brain was collected  
244 after perfusion. The successful opening of BBB was confirmed by observing EB  
245 exudation of brain tissue. The brain tissue was embedded and sectioned, and the  
246 safety was evaluated using hematoxylin and eosin (HE) staining.

247

248 Glioma U251 cells were transfected with Luciferase lentivirus to establish U251  
249 stably transfected cell line with Luciferase tag. The orthotopic tumor model of nude  
250 mice was established by injecting  $1 \times 10^6$  cells into the right striatum of nude mice.  
251 Seven days later, the xenograft tumor nude mice models were randomly divided into  
252 five groups, with five mice in each group. Each experimental group was treated  
253 accordingly every three days, and 200  $\mu$ l of PBS or Exos (1500  $\mu$ g/ml) was injected  
254 into the tail vein of nude mice until the nude mice died. The two groups combined  
255 with FUS were injected with Exos after BBB opening and irradiated with FUS again  
256 12 h later. The tumor growth was dynamically monitored by the small animal *in vivo*  
257 imaging system every five days, and the survival of nude mice was recorded daily.  
258 Survival analysis was performed using Kaplan–Meier survival curve, and HE staining  
259 and Ki-67 immunohistochemical experiments were performed on tumor tissues of  
260 each experimental group.

261

#### 262 **Xenograft experiment in nude mouse**

263 In the Xenograft subcutaneous tumor experiment in nude mouse, the experimental  
264 animals were randomly divided into five groups with five mice in each group. The  
265 corresponding U251 or U373 cell suspensions (200  $\mu$ l of PBS containing  $3 \times 10^5$  cells)  
266 were planted in the right armpit of nude mice. The growth of nude mice and changes  
267 of tumor sites were observed, and the tumor volumes were measured and recorded  
268 every four days. Tumor volume was calculated as follows: volume ( $\text{mm}^3$ ) =  $0.5 \times$   
269 (longest diameter)  $\times$  (shortest diameter)<sup>2</sup>, and the data were statistically analyzed after  
270 44 days.

271

272 The grouping of orthotopic tumor transplantation experiment in nude mice is  
273 consistent with that of the subcutaneous experiment. Approximately  $1 \times 10^6$  cells  
274 were injected into the right striatum of nude mice using a brain stereotaxic instrument  
275 (the death of nude mice within seven days of injection was considered not related to  
276 tumor formation, and new nude mice would be added). The survival of nude mice was  
277 recorded daily, and the mice were sacrificed on the 50<sup>th</sup> day, and the Kaplan–Meier

278 survival curve was used for analysis.

279

280 All animal experiments were approved by the Laboratory Animal Management

281 Committee of Shengjing Hospital of China Medical University.
